# Supplementary material for: Proteomic Selection of Immunodiagnostic Antigens for Human African Trypanosomiasis and Generation of a Prototype Lateral Flow Immunodiagnostic Device
Source: PubMed Central journal article supplement (PMC3584999; doi:10.1371/journal.pntd.0002087), 2013-02-28

Figure S2

## Lateral flow test flow chart

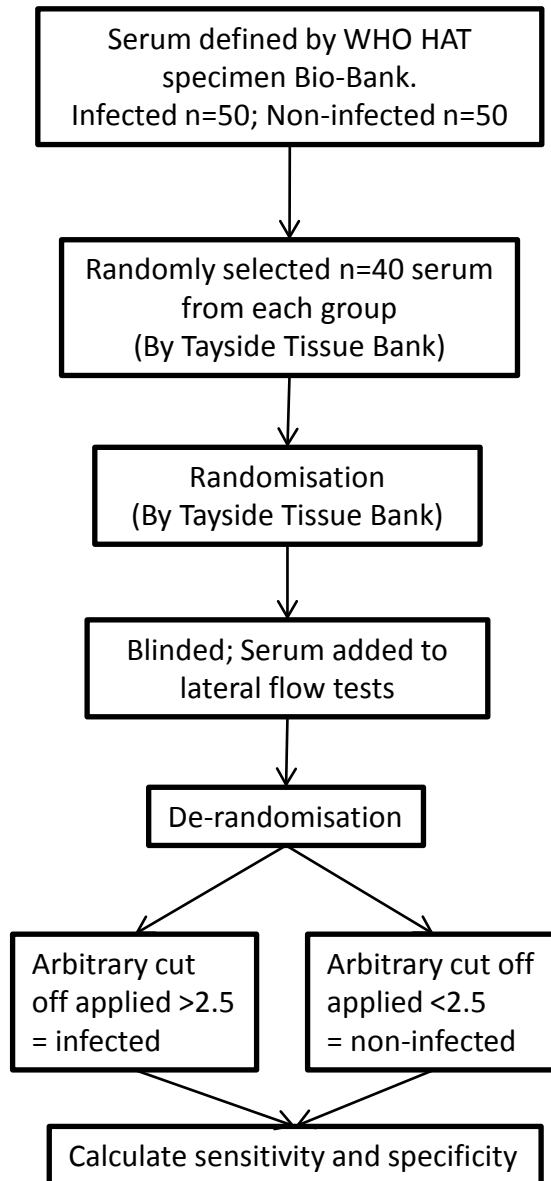

Supplement: pntd.0002087.s002.pdf [file pntd.0002087.s002.pdf]
